# Supplementary material for: Perturbational phenotyping of human blood cells reveals genetically determined latent traits associated with subsets of common diseases
Source: PubMed Central journal article supplement (PMC10786715; doi:10.1038/s41588-023-01600-x), 2023-12-04
Supplement: 41588_2023_1600_MOESM1_ESM.pdf [file 41588_2023_1600_MOESM1_ESM.pdf]

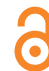

# **Perturbational phenotyping of human blood cells reveals genetically determined latent traits associated with subsets of common diseases**

---

In the format provided by the authors and unedited

## Supplementary Notes

### **Estimating the number of independent traits.**

While this approach generated high-dimensional blood profiles across all conditions, we also observed highly correlated traits across cell types, readouts, and conditions. We estimated a lower bound for the number of independent traits to be 350 traits based on the number of PCA components required to explain 90% of the variance observed across our screening cohort (**Supplementary Fig. 5**).

### **Handling of delayed entry in EHR.**

We aimed to identify blood readouts associated with the age-of-onset of specific diseases. However, the data in both MGB and UK biobanks only included diagnosis or self-reported disease onset dates, potentially missing early unobserved events. To address this, we set the observation period start as the first date with any available diagnosis in the EHR and used a counting-process style Cox model to handle delayed entry (left truncation)<sup>1</sup>.

### **Differences in PGS associations in MGB Biobank and UKBB.**

We observed many significant associations that are unique to either the MGB or UK Biobank (**Supplementary Figs. 6, 7, Extended Data File S4, S5**), which is likely a consequence of the differences between these two datasets. When analyzing the MGB cohort, we benefitted from the availability of more precise disease definitions and fine-grained diagnostics/clinical measurements over time, while in the UK Biobank, many of the disease traits were self-reported or mapped to higher-level billing terms to protect privacy. Additionally, the MGB dataset contains many diseases that are not defined in the UK Biobank. Conversely, the significantly larger sample size of the UK Biobank allowed for the identification of many significant disease associations that were not observed in the MGB cohort.

<sup>1</sup> Therneau, T.M., and Grambsch, P.M. (2000). Modeling Survival Data: Extending the Cox Model. *Stat. Biol. Heal.*, 39–77. 10.1007/978-1-4757-3294-8\_3

# Supplementary Figures

**Supplementary Fig. 1 Distribution of blood readouts under baseline and perturbation conditions.**

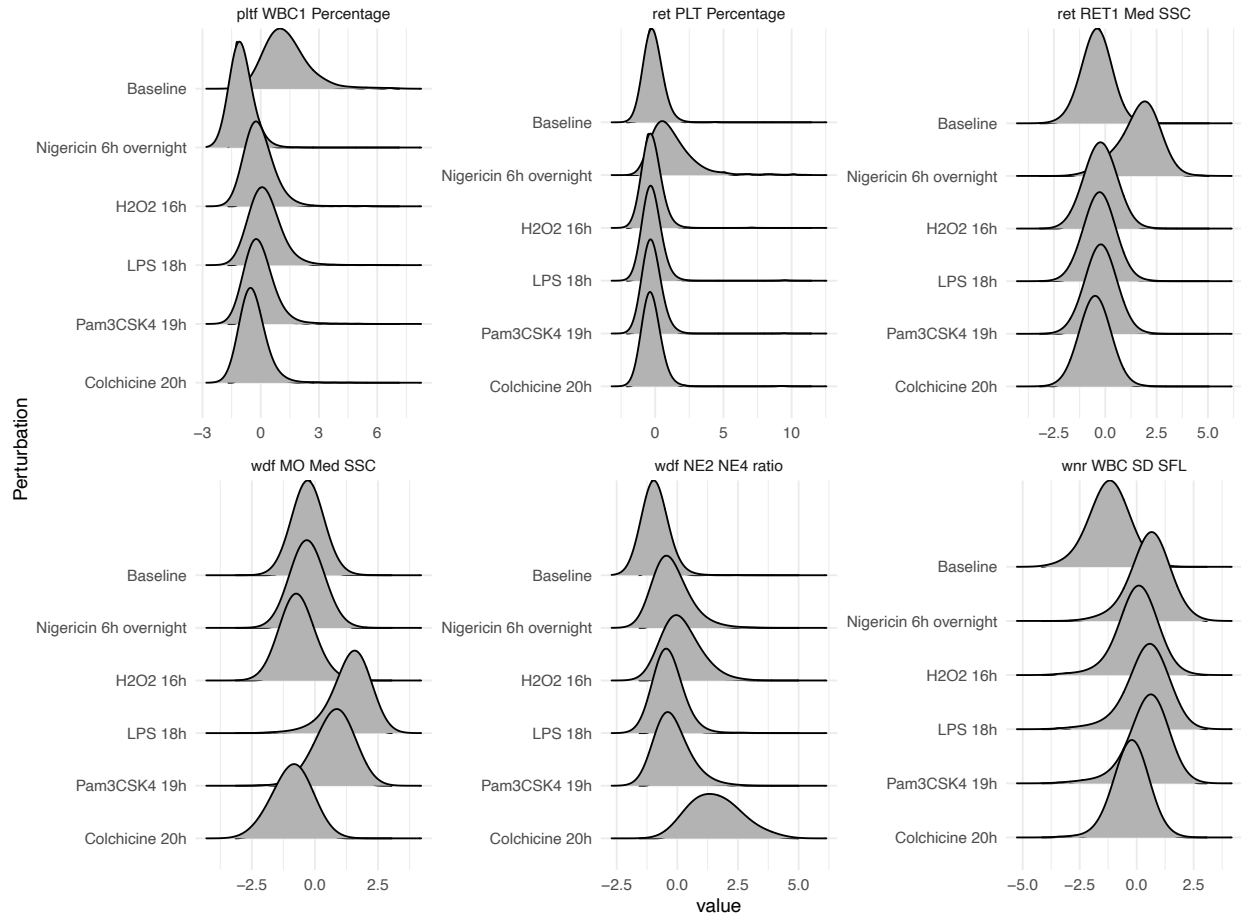

Quantitative parameters were defined by first gating cytometry readouts by cell type and calculating statistical parameters such counts, or median and standard deviation in dimensions such as side scatter (SSC) and side fluorescence (SFL) for each cell type.

**Supplementary Fig. 2 Clinical associations of blood readouts with blood-perturbation responses.**

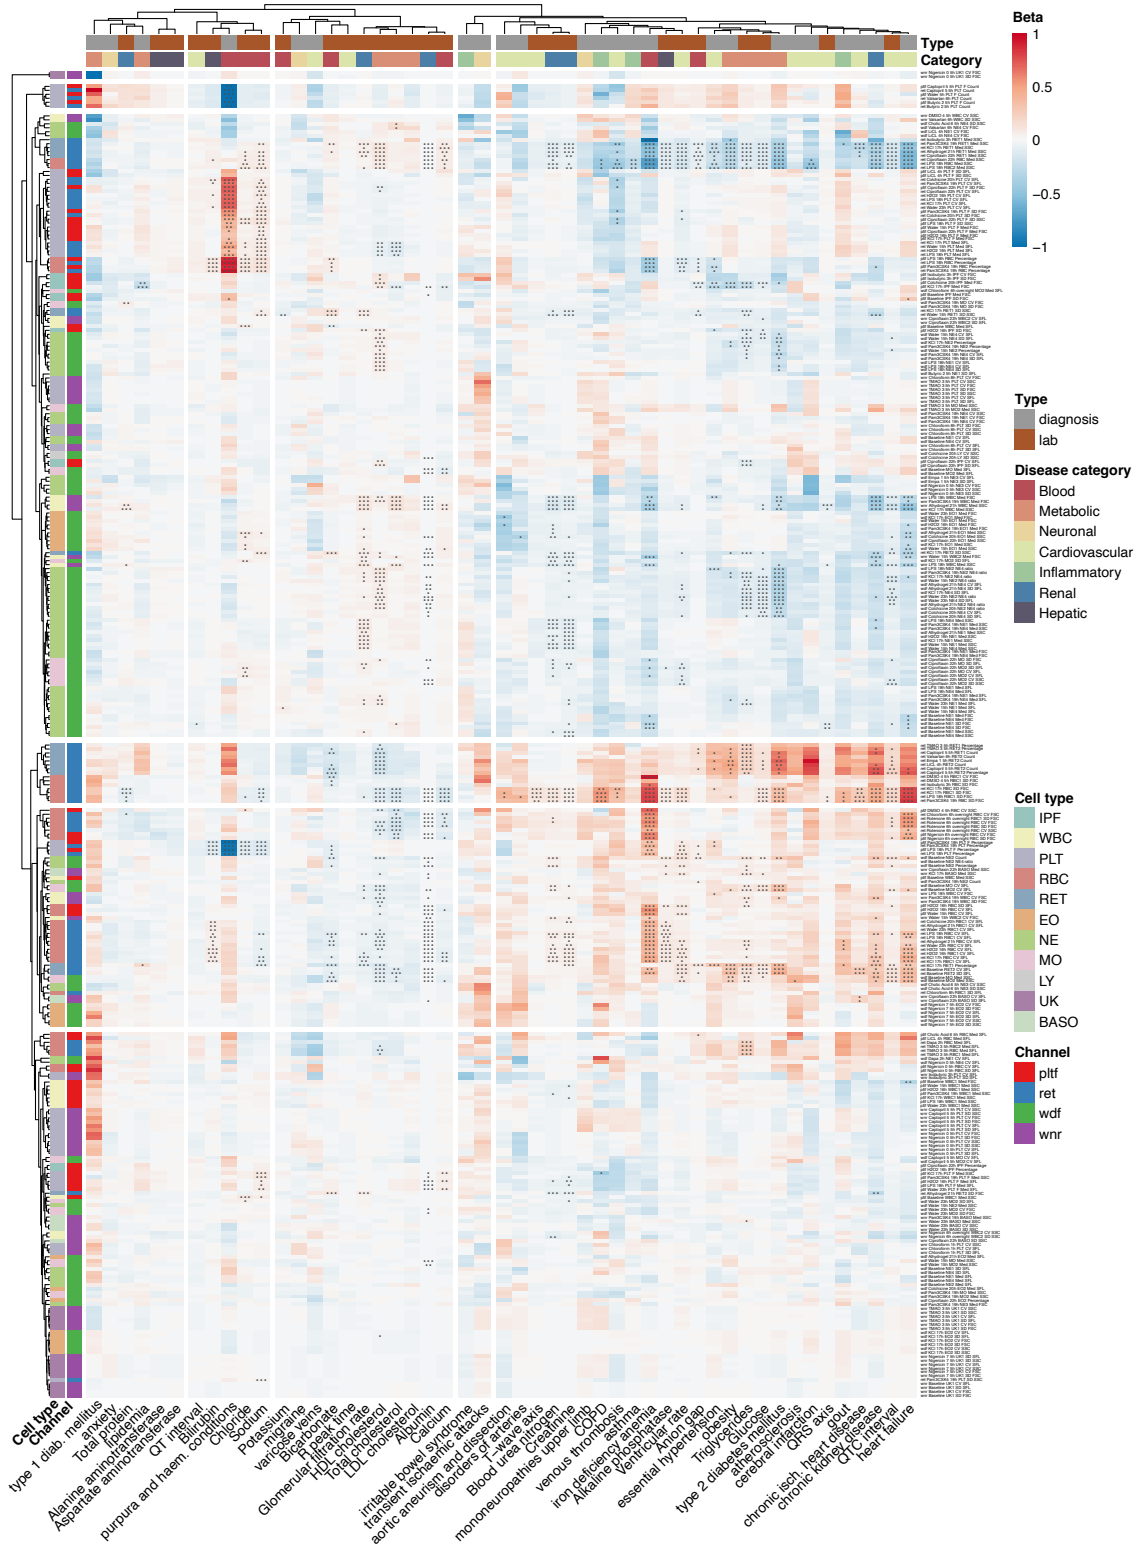

Pairwise association between quantile-transformed blood readouts and clinical lab values or diagnostic codes. Association beta coefficients were estimated using linear and logistic regression models for quantitative lab measurements and binary traits (ICD10 diagnostic codes), respectively. Positive associations are shown in red, negative associations are shown in blue. P values are based on two-sided t-tests and Wald tests. Points indicate significant associations after multiple testing correction using FDR across all tested diseases and blood traits (50 clinical outcomes and 327 blood readouts) with adjusted p-value thresholds: · 0.001, · · 0.001, · · · 0.0001. See Table S3 for clinical trait definitions using diagnostic codes, and **Extended Data File S2** for all association results with  $FDR < 0.1$ .

**Supplementary Fig. 3 Hazard ratio estimates for time to disease onset computed using perturbation blood-response PGS in meta-analysis of MGB Biobank and UKBB.**

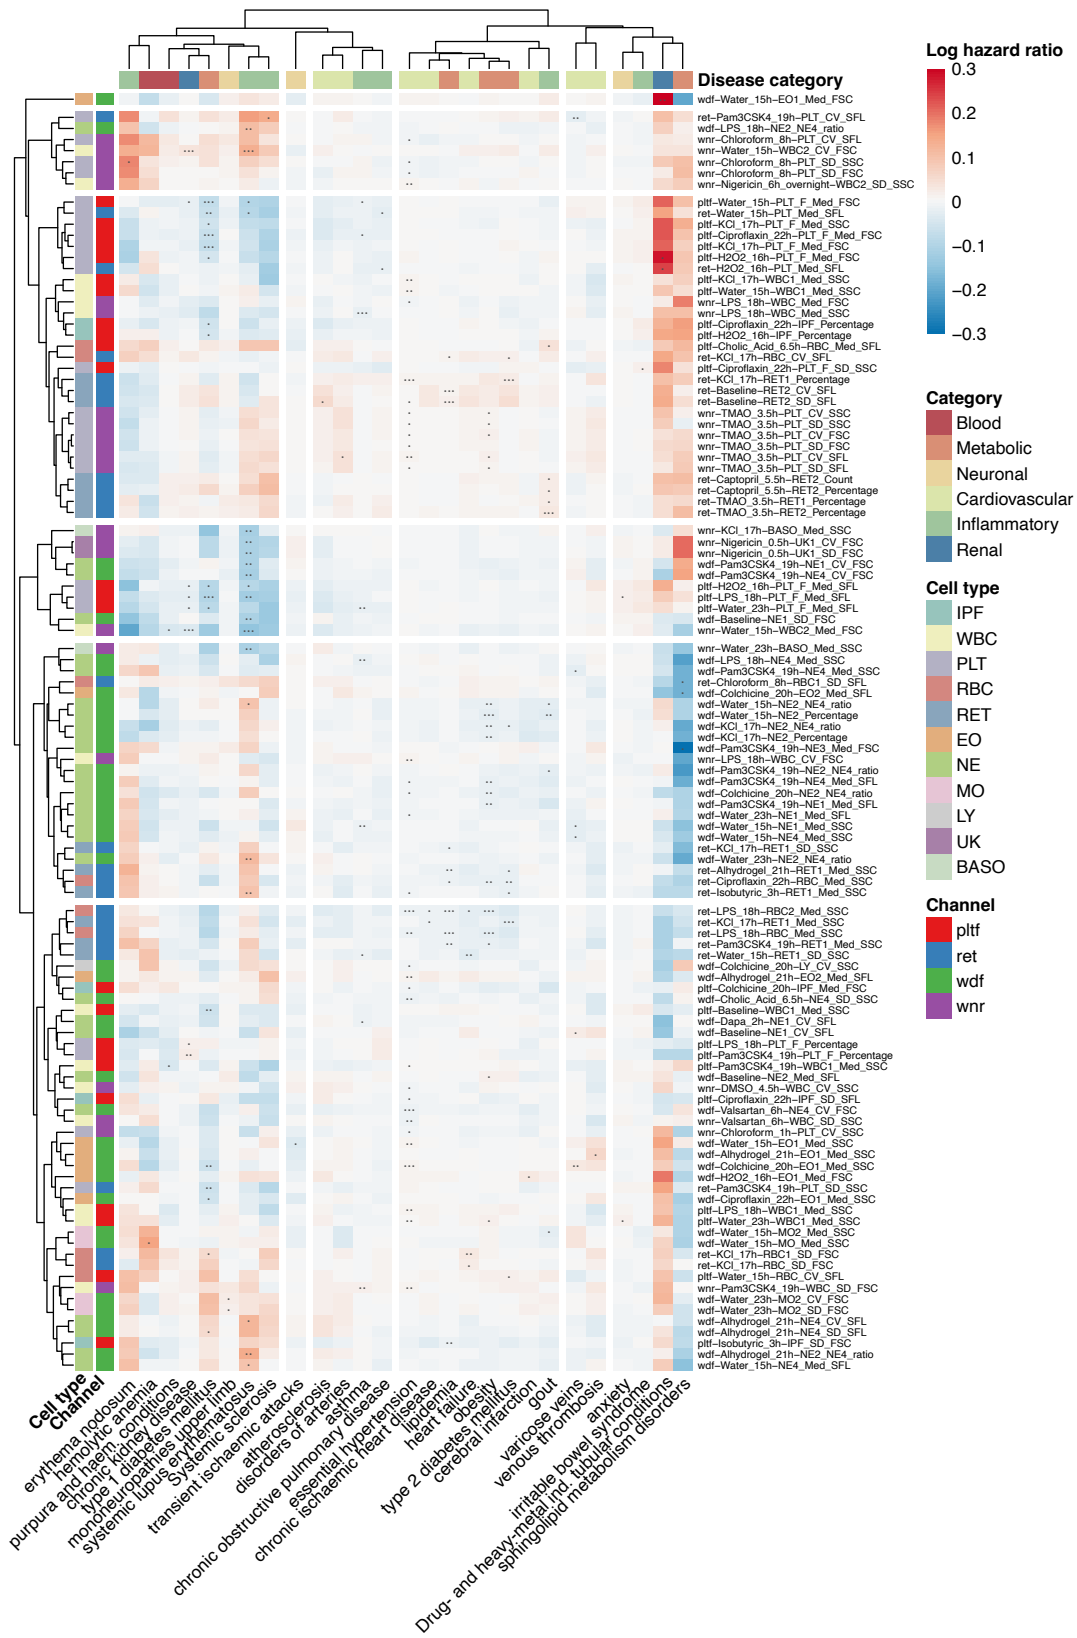

Hazard ratio estimates in time-to-event models from a meta-analysis of clinical outcomes in the MGB Biobank and the UK Biobank. Time to first diagnostic code or diagnosis date in the medical problem list was modeled using sex, the first two genetic principal components, and scaled blood-response polygenic scores in each cohort. Meta-analysis P values are based on two-sided z-scores in random effects models. Points indicate significant associations after multiple testing correction across all tested diseases and blood traits (20 clinical outcomes and 327 blood readouts) with adjusted p-value thresholds: · 0.05, · · 0.01, · · · 0.001. Shown are blood traits and outcomes with at least one significant association.

**Supplementary Fig. 4 RBC side fluorescence and covariates.**

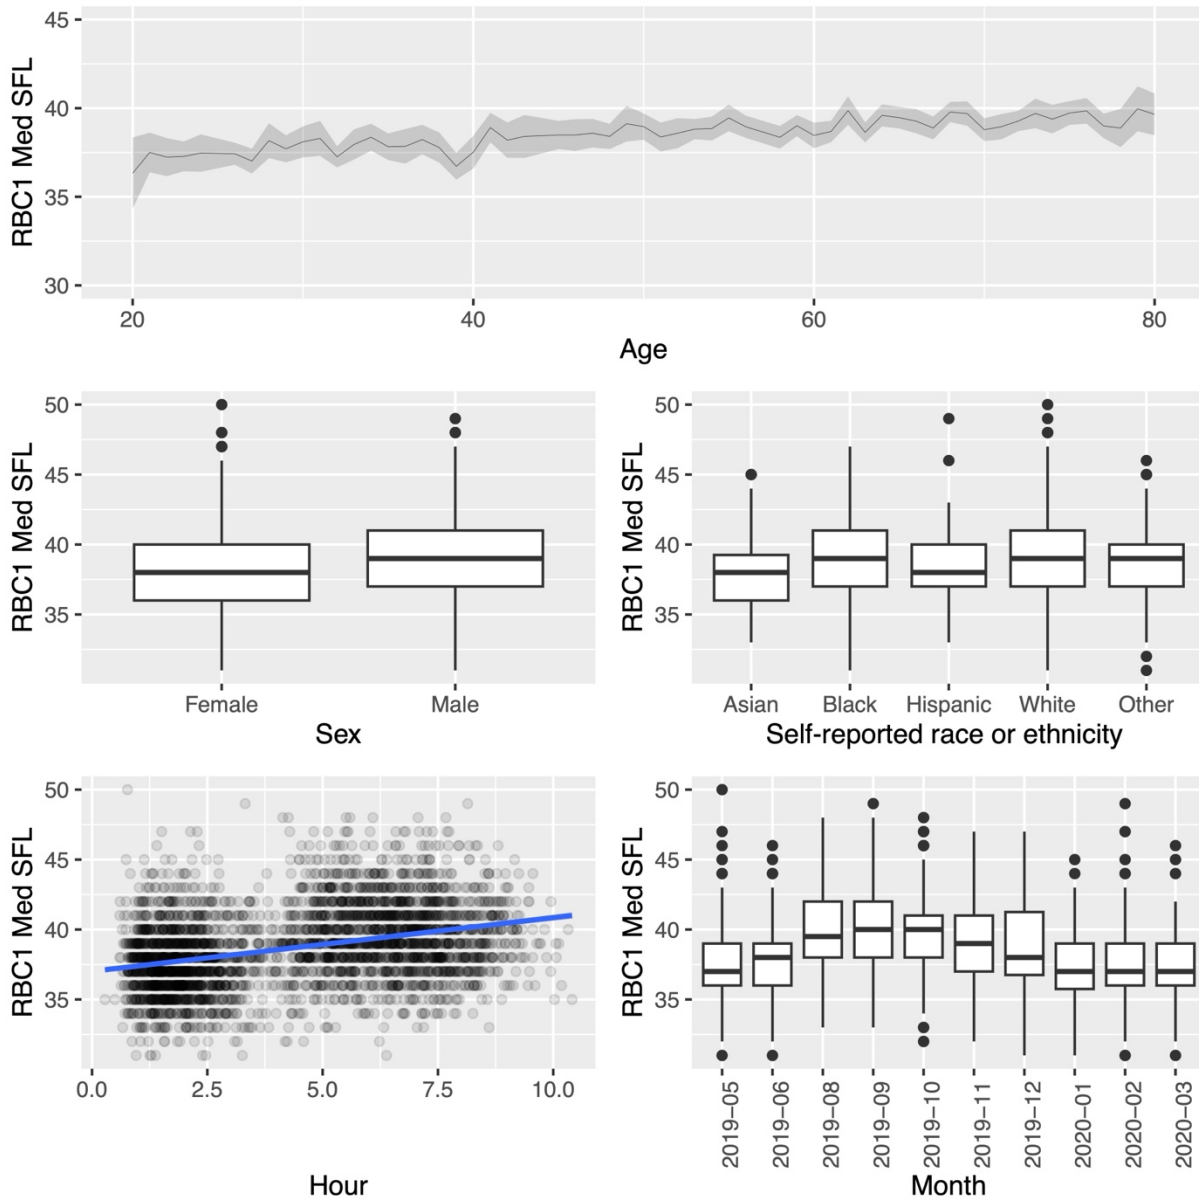

Biological and technical covariates affecting blood readouts under baseline conditions. We observed significant associations with participants age, sex, race, the time between blood draw and analysis as well as the month of the study in multiple blood readouts, RBC1 SFL is shown here as example. These variables together with genotyping-specific covariates (first ten principal components of genotype matrix, genotyping platform, and genotyping batch) were used as covariates in genetic association models. Data shown based on 3391 baseline samples, error bands in age panel show 95%CI. Boxplots represent the interquartile range (IQR) between the first and third quartiles as the box, the median as the line inside the box, and the whiskers extend from the box to the largest and smallest values within 1.5 \* IQR, with any points outside of this range shown as individual outliers.



### Supplementary Fig. 5 Estimated number of independent traits.

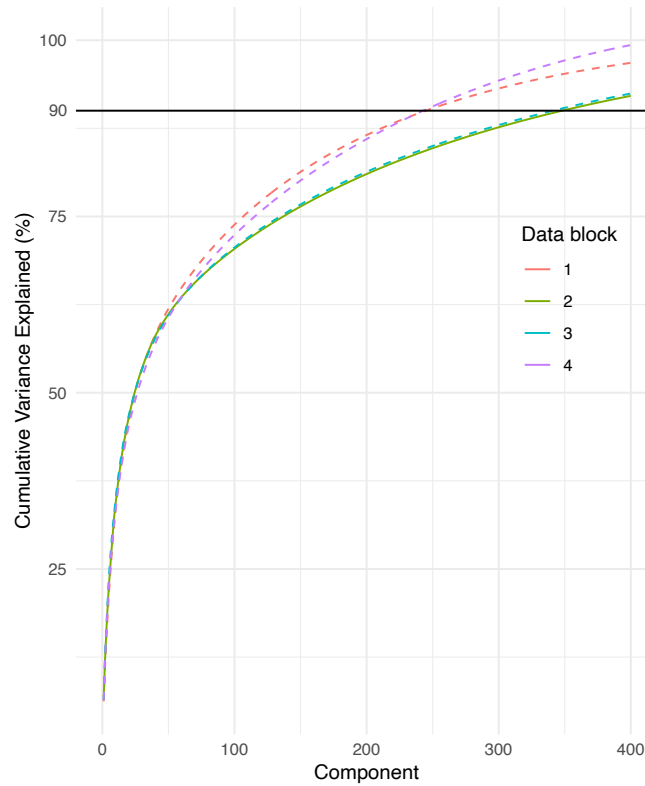

We identified blocks of measurements (subsets of subjects and conditions) with low missingness over the course of the study. We then calculated the number of PCA components that cumulatively explain 90% of the observed variance in these contiguous blocks of blood measurements. We estimate a lower bound of at least 350 independent traits given our current data. A more precise estimation would require complete measurements across all conditions in larger numbers of subjects simultaneously.

**Supplementary Fig. 6 Hazard ratio estimates for time to disease onset computed using perturbation blood-response PGS in the MGB Biobank.**

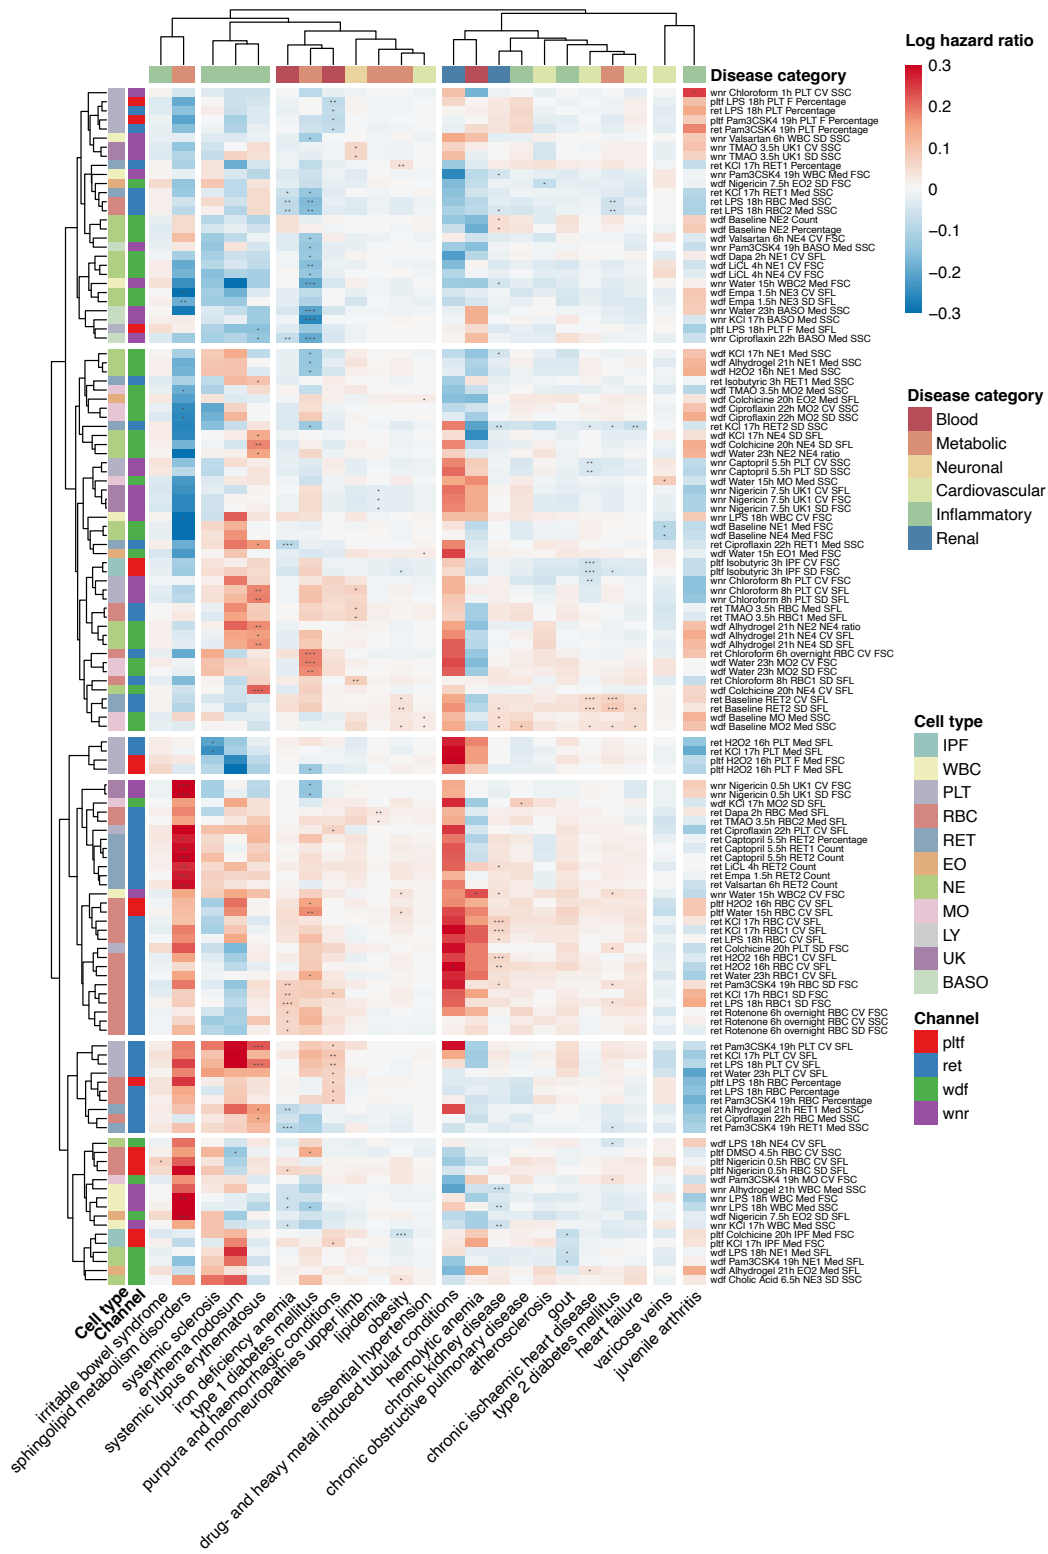

Hazard ratio estimates in time-to-event models for clinical outcomes in the MGB Biobank. Time to first diagnostic code or diagnosis date in the medical problem list was modeled using sex, the first two genetic principal components and scaled blood-response polygenic scores. P values are obtained from Cox PH models with delayed entry (two-sided test) and corrected for multiple testing using FDR. Points indicate significant associations after multiple testing correction across all tested diseases and blood traits (20 clinical outcomes and 327 blood readouts) with adjusted P value thresholds: · 0.05, · · 0.01, · · · 0.001. Shown are blood traits and outcomes with at least one significant association.

**Supplementary Fig. 7 Hazard ratio estimates for time to disease onset computed using perturbation blood-response PGS in the UKBB.**

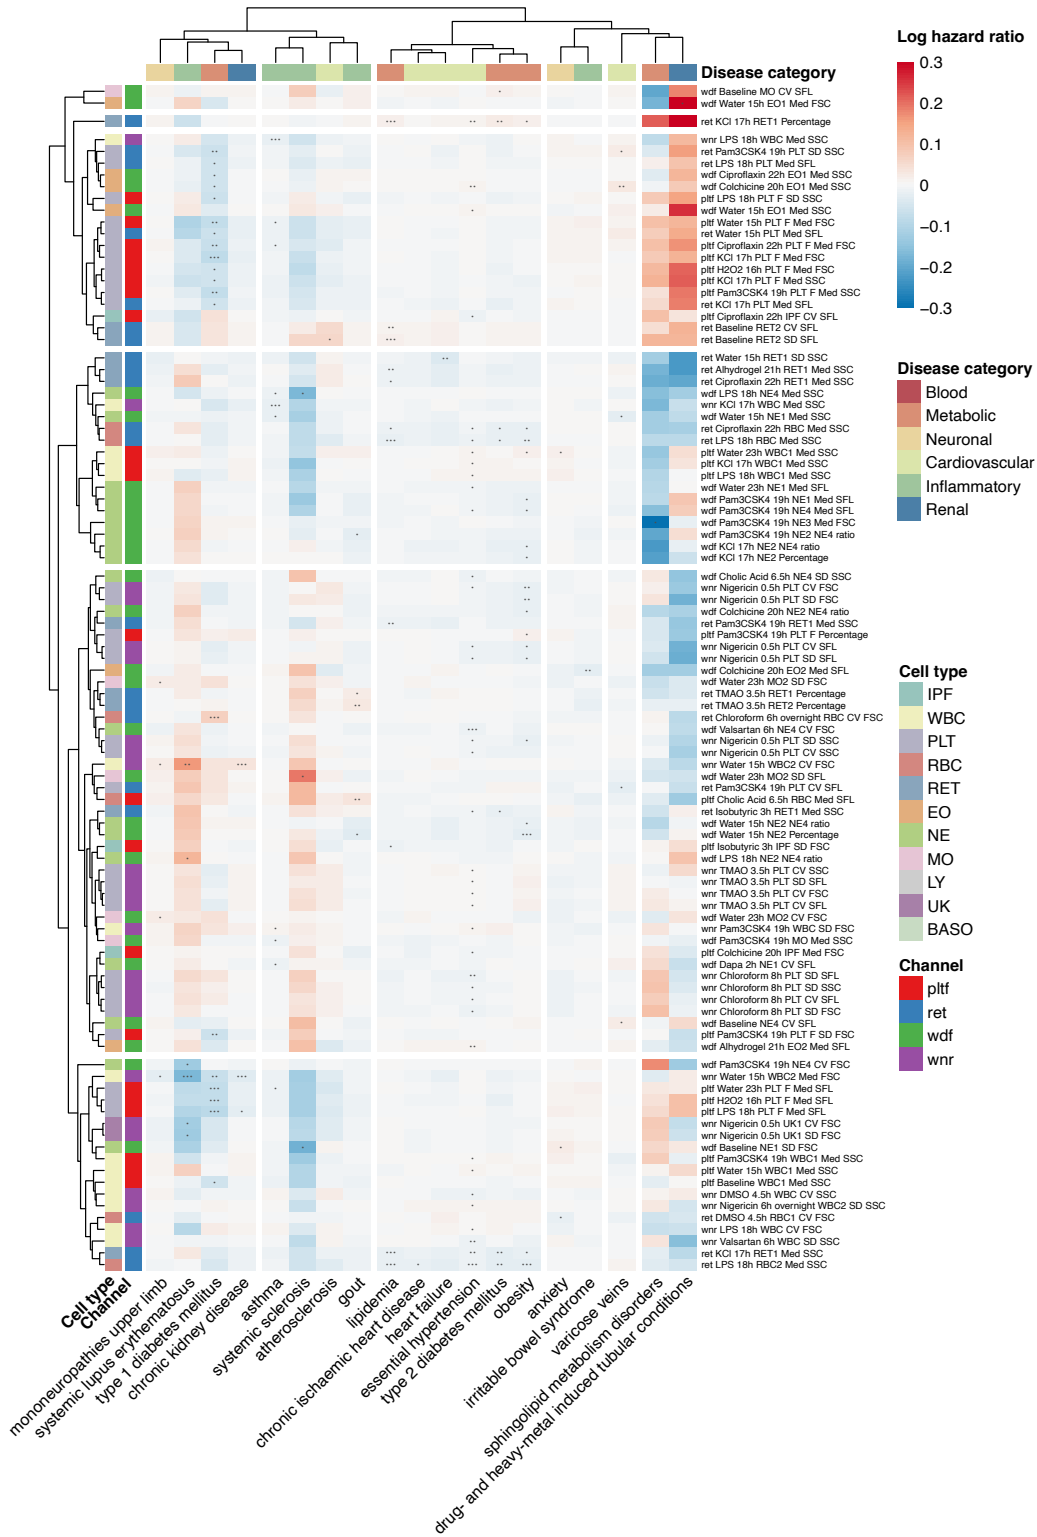

Hazard ratio estimates in time-to-event models for clinical outcomes in the UKBB. Time to first diagnostic code or diagnosis date in the medical problem list was modeled using sex, the first two genetic principal components and scaled blood-response polygenic scores. P values are obtained from Cox PH models with delayed entry (two-sided test) and corrected for multiple testing using FDR. Points indicate significant associations after multiple testing correction across all tested diseases and blood traits (30 clinical outcomes and 327 blood readouts) with adjusted P value thresholds: · 0.05, · · 0.01, · · · 0.001. Shown are blood traits and outcomes with at least one significant association.

# Supplementary Tables

**Supplementary Table 1. Perturbation conditions.**

| Condition               | Incubation time                                       | Concentration                  | Blood profiles | Genotypes | QCed EUR Genotypes |
|-------------------------|-------------------------------------------------------|--------------------------------|----------------|-----------|--------------------|
| Baseline                | 0h                                                    |                                | 3223           | 2271      | 1705               |
| Water 6h                | 6h at 39C                                             |                                | 717            | 265       | 164                |
| LPS 6h                  | Add LPS, 6h at 39C                                    | 1 ug/mL                        | 719            | 267       | 167                |
| Chloroform 6h           | 4h at 39C, add chloroform, 2h at 39C                  |                                | 717            | 266       | 168                |
| LPS Nigericin 6h        | Add LPS, 4h at 39C, add nigericin, 2h at 39C          | 1 ug/mL LPS<br>2.5uM Nigericin | 733            | 270       | 169                |
| Nigericin 6h            | 4h at 39C, add nigericin, 2h at 39C                   | 2.5uM                          | 723            | 264       | 165                |
| Nigericin 6h overnight  | Overnight at 4C, 4h at 39C, add nigericin, 2h at 39C  | 2.5uM                          | 1482           | 1276      | 974                |
| Chloroform 6h overnight | Overnight at 4C, 4h at 39C, add chloroform, 2h at 39C |                                | 1472           | 1275      | 966                |
| Rotenone 6h overnight   | Overnight at 4C, 4h at 39C, add rotenone, 2h at 39C   | 2.5uM                          | 1458           | 1255      | 954                |
| Water 15h               | 15h at 39C                                            |                                | 3303           | 1972      | 1429               |
| H2O2 16h                | Add H2O2, 16h at 39C                                  | 20mM                           | 3258           | 1940      | 1404               |
| KCl 17h                 | Add KCl, 17h at 39C                                   | 10mM                           | 3304           | 1971      | 1427               |
| LPS 18h                 | Add LPS, 18h at 39C                                   | 1 ug/mL                        | 3294           | 1970      | 1434               |
| Pam3CSK4 19h            | Add Pam3CSK4, 19h at 39C                              | 0.1 ug/mL                      | 3227           | 1931      | 1406               |
| Colchicine 20h          | Add colchicine, 20h at 39C                            | 30 ng/mL                       | 3199           | 1941      | 1409               |
| Alhydrogel 21h          | Add alhydrogel, 21h at 39C                            | 120 ug/mL                      | 3255           | 1936      | 1401               |
| Ciproflaxin 22h         | Add ciproflaxin, 22h at 39C                           | 100 ug/mL                      | 3231           | 1944      | 1407               |
| Water 23h               | 23h at 39C                                            |                                | 3331           | 1995      | 1441               |
| Nigericin 0.5h          | Add nigericin, 0.5h at 39C                            | 2.5 uM                         | 700            | 500       | 390                |
| Chloroform 1h           | Add chloroform, 1h at 39C                             |                                | 653            | 462       | 361                |
| Empa 1.5h               | Add empagliflozin, 1.5h at 39C                        | 2.14mM                         | 692            | 498       | 390                |
| Dapa 2h                 | Add dapagliflozin, 2h at 39C                          | 2.13mM                         | 641            | 449       | 348                |
| Butyric 2.5h            | Add butyric acid, 2.5h at 39C                         | 16mM                           | 692            | 493       | 385                |
| Isobutyric 3h           | Add isobutyric acid, 3h at 39C                        | 16mM                           | 679            | 484       | 378                |
| TMAO 3.5h               | Add trimethylamine N-oxide, 3.5h at 39C               | 166mM                          | 671            | 478       | 376                |
| LiCl 4h                 | Add LiCl, 4h at 39C                                   | 39.22mM                        | 693            | 498       | 390                |

|                    |                                   |       |      |     |     |
|--------------------|-----------------------------------|-------|------|-----|-----|
| DMSO 4.5h          | Add DMSO, 4.5h at 39C             |       | 696  | 497 | 390 |
| Water 5h           | 5h at 39C                         |       | 694  | 496 | 389 |
| Captopril 5.5h     | Add captopril, 5.5h at 39C        | 200mM | 678  | 487 | 384 |
| Valsartan 6h       | Add valsartan, 6h at 39C          | 428uM | 674  | 492 | 386 |
| Cholic Acid 6.5h   | Add cholic acid, 6.5h at 39C      | 21uM  | 674  | 485 | 381 |
| Acetic Acid 7h     | Add acetic acid, 7h at 39C        | 12mM  | 670  | 485 | 383 |
| Nigericin 7.5h     | Add nigericin, 7.5h at 39C        | 2.5uM | 653  | 470 | 368 |
| Chloroform 8h      | Add chloroform, 8h at 39C         |       | 656  | 467 | 366 |
| Nigericin 12 + 6h  | 4h 39C, add nigericin, 2h at 39C  | 2.5uM | 1238 | 292 | 164 |
| Chloroform 12 + 6h | 4h 39C, add chloroform, 3h at 39C |       | 1303 | 301 | 166 |
| Rotenone 12 + 6h   | 4h 39C, add rotenone, 4h at 39C   | 2.5uM | 1310 | 306 | 167 |

**Supplementary Table 2. Abbreviations used for cell traits.**

| <b>Abbreviation</b>           | <b>Full Name</b>                                        |
|-------------------------------|---------------------------------------------------------|
| <b>Sysmex Dye/Channels</b>    |                                                         |
| WDF                           | White Cell Differential Channel by Fluorescence Channel |
| WNR                           | White Count and Nucleated Red Blood Cells Channel       |
| PLT-F                         | Platelet-F Channel                                      |
| RET                           | Reticulocyte Channel                                    |
|                               |                                                         |
| <b>Cell Types</b>             |                                                         |
| RBC                           | Red blood cell                                          |
| WBC                           | White blood cell                                        |
| NE                            | Neutrophil                                              |
| MO                            | Monocyte                                                |
| BASO                          | Basophil                                                |
| EO                            | Eosinophil                                              |
| LY                            | Lymphocyte                                              |
| IPF                           | Immature Platelet Fraction                              |
| PLT                           | Platelet                                                |
| RET                           | Reticulocyte                                            |
| UK                            | Unknown Cell Population                                 |
|                               |                                                         |
| <b>Statistical Parameters</b> |                                                         |
| Med                           | Median                                                  |
| CV                            | Robust Coefficient of Variation                         |
| SD                            | Robust Standard Deviation                               |
|                               |                                                         |
| <b>Measurements</b>           |                                                         |
| FSC                           | Forward Scatter                                         |
| SSC                           | Side Scatter                                            |
| SFL                           | Side Fluorescence                                       |



**Supplementary Table 3. Demographics of screening cohort.**

|                                        |           | Missing | Overall     |
|----------------------------------------|-----------|---------|-------------|
| n                                      |           |         | 4723        |
| Age, mean (SD)                         |           | 0       | 54.8 (17.2) |
| Sex, n (%)                             | Female    | 0       | 2368 (50.1) |
|                                        | Male      |         | 2354 (49.8) |
|                                        | Unknown   |         | 1 (0.0)     |
| Self-reported race or ethnicity, n (%) | Asian     | 0       | 177 (3.7)   |
|                                        | Black     |         | 437 (9.3)   |
|                                        | Hispanic  |         | 76 (1.6)    |
|                                        | Other     |         | 347 (7.3)   |
|                                        | White     |         | 3686 (78.0) |
| Tobacco, n (%)                         | Never     | 66      | 2845 (61.1) |
|                                        | Not Asked |         | 5 (0.1)     |
|                                        | Passive   |         | 13 (0.3)    |
|                                        | Quit      |         | 1546 (33.2) |
|                                        | Yes       |         | 248 (5.3)   |
| BMI, mean (SD)                         |           | 144     | 28.6 (6.6)  |
| Genotyped, n (%)                       | False     | 0       | 2038 (43.2) |
|                                        | True      |         | 2685 (56.8) |

**Supplementary Table 4. ICD10 diagnostic code definitions used for disease associations.**

| Category       | Name                                                                     | ICD10 Prefix | UKBB Trait ID |
|----------------|--------------------------------------------------------------------------|--------------|---------------|
| Blood          | iron deficiency anemia                                                   | D50          | f130622       |
| Blood          | hemolytic anemia                                                         | D59          | f130638       |
| Blood          | purpura and hemorrhagic conditions                                       | D69          | f130658       |
| Metabolic      | type 1 diabetes mellitus                                                 | E10          | f130706       |
| Metabolic      | type 2 diabetes mellitus                                                 | E11          | f130708       |
| Metabolic      | obesity                                                                  | E66          | f130792       |
| Metabolic      | sphingolipid metabolism disorders                                        | E75          | f130808       |
| Metabolic      | lipidemia                                                                | E78          | f130814       |
| Neuronal       | anxiety                                                                  | F41          | f130906       |
| Neuronal       | transient ischemic attacks                                               | G45          | f131056       |
| Neuronal       | mononeuropathies upper limb                                              | G56          | f131074       |
| Cardiovascular | essential hypertension                                                   | I10          | f131286       |
| Cardiovascular | chronic ischemic heart disease                                           | I25          | f131306       |
| Cardiovascular | heart failure                                                            | I50          | f131354       |
| Cardiovascular | cerebral infarction                                                      | I63          | f131366       |
| Cardiovascular | atherosclerosis                                                          | I70          | f131380       |
| Cardiovascular | aortic aneurism and dissection                                           | I71          | f131382       |
| Cardiovascular | disorders of arteries                                                    | I77          | f131390       |
| Cardiovascular | venous thrombosis                                                        | I82          | f131400       |
| Cardiovascular | varicose veins                                                           | I83          | f131402       |
| Inflammatory   | chronic obstructive pulmonary disease                                    | J44          | f131492       |
| Inflammatory   | asthma                                                                   | J45          | f131494       |
| Inflammatory   | irritable bowel syndrome                                                 | K58          | f131638       |
| Inflammatory   | erythema nodosum                                                         | L52          | f131758       |
| Inflammatory   | juvenile arthritis                                                       | M08          | f131854       |
| Inflammatory   | gout                                                                     | M10          | f131858       |
| Inflammatory   | systemic lupus erythematosus                                             | M32          | f131894       |
| Inflammatory   | systemic sclerosis                                                       | M34          | f131898       |
| Renal          | drug- and heavy-metal-induced tubulo-interstitial and tubular conditions | N14          | f132024       |
| Renal          | chronic kidney disease                                                   | N18          | f132032       |

**Supplementary Table 5. Reagents and assays.**

| REAGENT                                        | SOURCE                      | IDENTIFIER  |
|------------------------------------------------|-----------------------------|-------------|
| Antibodies                                     |                             |             |
| CD11b Pacific Blue, clone ICRF44               | BioLegend                   | 3013215     |
| CD62L Alexa Flour 488, clone DREG-56           | BioLegend                   | 304816      |
| Chemicals, peptides, and recombinant proteins  |                             |             |
| 2-Deoxy-D-Glucose                              | MedChemExpress              | HY-13966    |
| Triacsin C                                     | TOCRIS                      | 2472        |
| Lipopolysaccharides from Escherichia coli      | Sigma-Aldrich               | L4391       |
| Chloroform                                     | Sigma-Aldrich               | C2432       |
| Hydrogen Peroxide                              | Sigma-Aldrich               | 216763      |
| Potassium Chloride                             | Sigma-Aldrich               | P9333       |
| Colchicine                                     | Sigma-Aldrich               | C9754       |
| Ciprofloxacin                                  | Sigma-Aldrich               | 17850       |
| Butyric Acid                                   | Sigma-Aldrich               | W222119     |
| Trimethylamine N-Oxide                         | Sigma-Aldrich               | 317594      |
| Lithium Chloride                               | Sigma-Aldrich               | 203637      |
| Captopril                                      | Sigma-Aldrich               | C4042       |
| Valsartan                                      | Sigma-Aldrich               | PHR1315     |
| Cholic Acid                                    | Sigma-Aldrich               | C1129       |
| Acetic Acid                                    | Sigma-Aldrich               | 695092      |
| Rotenone                                       | Santa Cruz<br>Biotechnology | 203242      |
| Pam3CSK4                                       | InvivoGen                   | tlrl-pms    |
| Alhydrogel adjuvant 2%                         | InvivoGen                   | Vac-alu-250 |
| Empagliflozin                                  | Advanced<br>ChemBlocks      | G-7261      |
| Dapagliflozin                                  | Millipore Sigma             | SML2804     |
| Isobutyric Acid                                | Millipore Sigma             | I1754       |
| Commercial assays                              |                             |             |
| XPp Real Time ATP Rate assay kit               | Agilent                     | 103591-100  |
| EasySep™ Direct Human Neutrophil Isolation Kit | STEMCELL                    | 19666       |
| EasySep™ RBC Depletion Reagent                 | STEMCELL                    | 18170       |
| AnnexinV Alexa Flour 555                       | Invitrogen                  | A35108      |
| SytoX Green Nucleic Acid Stain                 | Invitrogen                  | S7020       |
| CellROX Deep Red                               | Invitrogen                  | C10422      |

**Supplementary Table 6. Guide RNA targeting sequences.**

| Gene         | gRNA1 target sequence | gRNA2 target sequence |
|--------------|-----------------------|-----------------------|
| <i>hk1</i>   | GACATGGACGAAACGCTTCA  | ATCCGTTCTCCATTTCCCGT  |
| <i>pfkpa</i> | GTAGACGCAAGAAGTGCAGA  | TCCAATAACTGTGCCACCC   |
| <i>pfkpb</i> | AGGAGCGCCAACATTCAACA  | ATATCCACAATAACCCCCCA  |
| <i>acs1a</i> | CTCACTTACCGGCACCTCCA  | TGCACGTCGCTCTATCCTAA  |
| <i>acs1b</i> | AGGTACATCACACACCACCG  | ACATGGGCAAAACTCACCGG  |
